# Supplementary material for: Understanding Climate-Fire-Ecosystem Interactions UsingCESM-RESFire and Implications for Decadal ClimateVariability
Source: Copernicus journal article supplement (doi:10.5194/acp-2019-646), 2019-09-04
Supplement: Supplementary file 1 [file acp-2019-646-supplement.pdf]

# 1 Understanding Climate-Fire-Ecosystem Interactions Using 2 CESM-RESFire and Implications for Decadal Climate 3 Variability

4 Yufei Zou<sup>1†</sup>, Yuhang Wang<sup>1</sup>, Yun Qian<sup>2</sup>, Hanqin Tian<sup>3</sup>, Jia Yang<sup>4</sup>, Ernesto Alvarado<sup>5</sup>

5 <sup>1</sup>School of Earth and Atmospheric Sciences, Georgia Institute of Technology, Atlanta, GA 30332, USA.

6 <sup>2</sup>Pacific Northwest National Laboratory, Richland, WA 99354, USA.

7 <sup>3</sup>International Centre for Climate and Global Change Research, School of Forestry and Wildlife Sciences, Auburn  
8 University, AL 36849, USA.

9 <sup>4</sup>College of Forest Resources/Forest and Wildlife Research Center, Mississippi State University, MS 39762, USA.

10 <sup>5</sup>School of Environmental and Forest Sciences, University of Washington, Seattle, WA 98195, USA.

11 †Now at the School of Environmental and Forest Sciences, University of Washington, Seattle, WA 98195, USA.

12 *Correspondence to:* Yuhang Wang (yuhang.wang@eas.gatech.edu) and Yufei Zou (yzou2017@uw.edu)

## 13 Supplement

14 The AERONET network did not provide AOT measurements at 550 nm wavelength. For direct comparison with the  
15 model results, we estimated AERONET AOT at 550 nm by interpolating the measurements at two closest  
16 wavelengths at 500 nm and 675 nm. Specifically, the optical thickness of aerosols and the wavelength of light  
17 satisfies the power law (Ångström, 1929) in Eq. (S1):

$$18 \frac{\tau_{\lambda}}{\tau_{\lambda_0}} = \left(\frac{\lambda}{\lambda_0}\right)^{-\alpha}, \text{ (S1)}$$

19 where  $\tau_{\lambda}$  is the optical thickness at wavelength  $\lambda$ ,  $\tau_{\lambda_0}$  is the optical thickness at the reference wavelength  $\lambda_0$ , and  $\alpha$   
20 is the Ångström exponent.

21 We first calculated the Ångström exponent based on the optical thickness measured at 500 nm and 675 nm, then  
22 estimated the optical thickness at 550 nm using Eq. (S1) and AOT at 500 nm as the reference. The estimation  
23 equation is shown in Eq. (S2):

$$24 \tau_{550} = \tau_{500} \left(\frac{550}{500}\right)^{-\alpha}, \text{ where } \alpha = -\frac{\log \frac{\tau_{675}}{\tau_{500}}}{\log \frac{675}{500}}, \text{ (S2)}$$

25

## 26 Reference

27 Ångström, A.: On the Atmospheric Transmission of Sun Radiation and on Dust in the Air, *Geografiska Annaler*, 11,  
28 2, 156–166. doi:10.1080/20014422.1929.11880498, 1929.
